# Supplementary material for: Efficient HPLC-ELSD analysis of sodium and phosphate in aripiprazole extended-release injectable suspensions using trimodal column technology
Source: Royal Society of Chemistry journal article supplement (doi:10.1039/d5ra07182h), 2025-01-01
Supplement: d5ra07182h1.pdf [file d5ra07182h1.pdf]

## **Electronic Supporting Information**

### **Efficient HPLC-ELSD Analysis of Sodium and Phosphate in Aripiprazole Extended-Release Injectable Suspensions Using Trimodal Column Technology**

Alexandra Bitziou<sup>1,2</sup>, Theodora Fotiou<sup>2,\*</sup>, Constantinos K. Zacharis<sup>1,\*</sup>

<sup>1</sup>*Laboratory of Pharmaceutical Analysis, Department of Pharmacy, Aristotle University of Thessaloniki, GR-54124, Greece*

<sup>2</sup>*Analytical Development laboratory, Innovative Formulations, Pharmathen SA, 31 Spartis Str., 14452 Metamorfosi Attica, Greece*

---

\*Corresponding author

Theodora Fotiou

Analytical Development Manager

Innovative Formulations,

Pharmathen S.A. Pharmaceutical Industry, 31 Spartis Str., 14452 Metamorfosi Attica, Greece

E-mail: [tfotiou@pharmathen.com](mailto:tfotiou@pharmathen.com)

\*Corresponding author

Constantinos K. Zacharis

Associate Professor

Laboratory of Pharmaceutical Analysis, Department of Pharmacy,

Aristotle University of Thessaloniki (AUTH),

GR-54124, Greece

Tel: +30 2310997663

E-mail: [czacharis@pharm.auth.gr](mailto:czacharis@pharm.auth.gr)

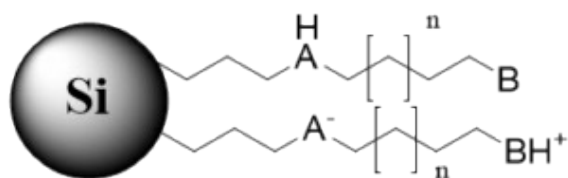

**Figure S1.** Schematic representation of functional groups of the trimodal stationary phase (Amaze TH mixed-mode, HELIX Chromatography). Where  $n$ , HA,  $A^-$ , B and  $BH^+$  represent the carbon chain, the acid group in non-ionized state, the acid group in ionized state, basic group in non-ionized state and basic group in ionized state, respectively.

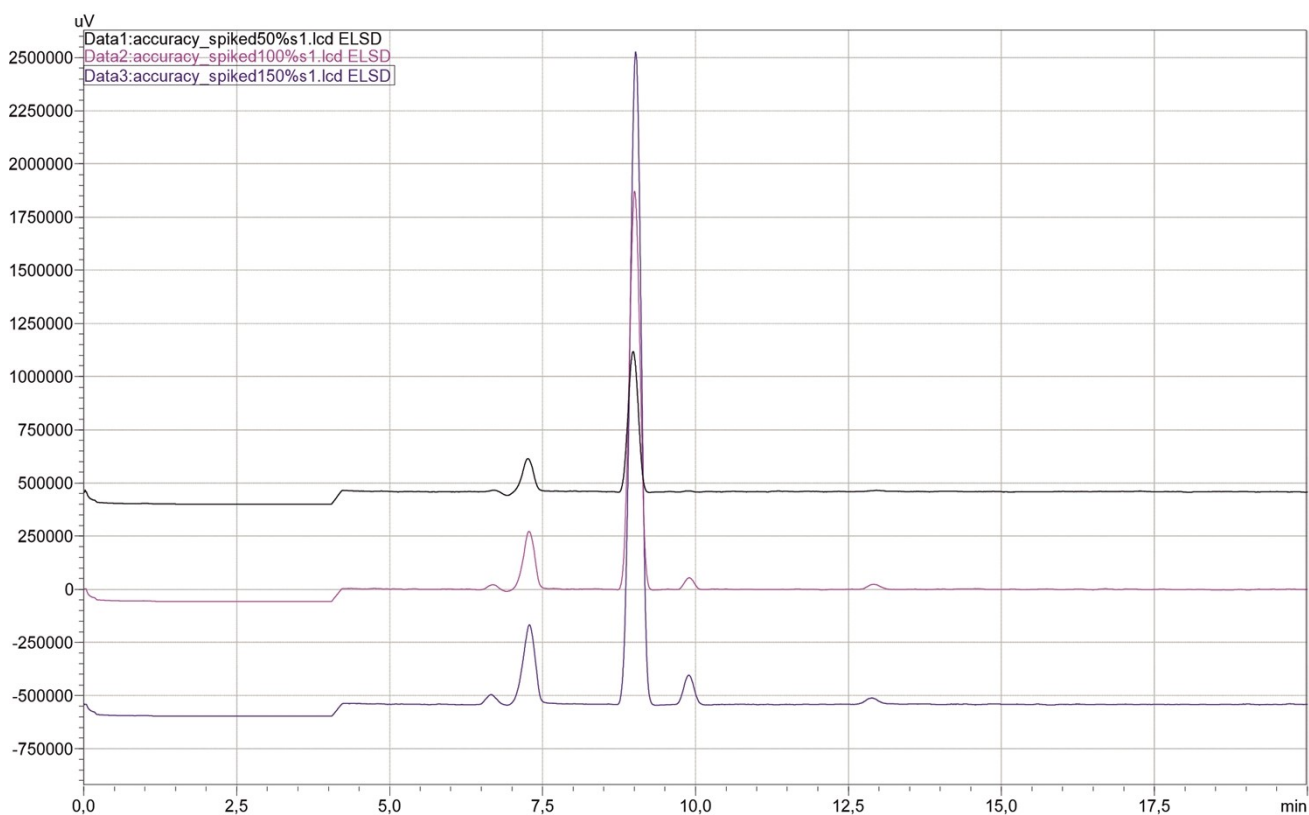

**Figure S2.** Representative HPLC-ELSD chromatograms of the analysis of samples spiked at concentration levels of 50, 100 and 150% of the specification level of each analyte. To prevent detector contamination, the mobile phase was diverted to waste during the first 4 minutes of the analysis.

**Table S1.** Comparison of common detection techniques for this type of analysis.

| <b>Detector</b> | <b>Detection principle</b>                                              | <b>Linearity</b>        | <b>Sensitivity (LOD)</b> | <b>Volatility compatibility</b> | <b>Advantages</b>                                     | <b>Limitations</b>                                                     |
|-----------------|-------------------------------------------------------------------------|-------------------------|--------------------------|---------------------------------|-------------------------------------------------------|------------------------------------------------------------------------|
| ELSD            | Light scattering from evaporated solvent particles                      | Non-linear              | Moderate                 | Non-volatile analytes           | Universal detection; compatible with gradient elution | Non-linear response<br>higher LOD                                      |
| CAD             | Charged aerosol detection                                               | Near linear             | High                     | Non-volatile analytes           | Excellent sensitivity; consistent response            | Higher cost, limited volatility range                                  |
| Conductivity    | Measurement of ionic current                                            | Linear                  | Very high                | Ionic analytes only             | Outstanding sensitivity for ionic species             | Limited to ionic compounds                                             |
| UV              | Absorbance of UV light                                                  | Linear                  | High                     | UV-active analytes              | Simple; cost-effective; widely available              | Requires chromophore, not universal                                    |
| RID             | Measurement of refractive index difference between sample and reference | Linear (isocratic only) | Moderate to low          | Non-volatile analytes           | Universal detection; non-destructive                  | Not compatible with gradient elution, poor sensitivity, baseline drift |

**Table S2.** System suitability test (SST) values.

| Run                           | Phosphate ion |                      | Sodium ion |                      | R <sub>s</sub> <sup>a</sup> |
|-------------------------------|---------------|----------------------|------------|----------------------|-----------------------------|
|                               | Peak area     | R <sub>t</sub> (min) | Peak area  | R <sub>t</sub> (min) |                             |
| 1                             | 2503388       | 7.30                 | 24529628   | 9.08                 | 5.3                         |
| 2                             | 2476864       | 7.30                 | 25146595   | 9.09                 | 5.3                         |
| 3                             | 2526614       | 7.30                 | 25064521   | 9.09                 | 5.2                         |
| 4                             | 2445364       | 7.30                 | 25208537   | 9.09                 | 5.3                         |
| 5                             | 2498988       | 7.30                 | 25701690   | 9.09                 | 5.3                         |
| 6                             | 2585120       | 7.30                 | 25177259   | 9.08                 | 5.4                         |
| %RSD                          | 1.9           | -                    | 1.5        | -                    | -                           |
| T <sub>f</sub> <sup>b</sup>   | 0.9           |                      | 1.0        |                      |                             |
| N <sub>min</sub> <sup>c</sup> | 7261          |                      | 11079      |                      |                             |

<sup>a</sup> Resolution between Phosphate and sodium peaks<sup>b</sup> tailing factor<sup>c</sup> minimum number of theoretical plates**Table S3.** Robustness test of the proposed HPLC-ELSD method.

|                                                          | Phosphate ion               |                                         | Sodium ion                  |                                         |
|----------------------------------------------------------|-----------------------------|-----------------------------------------|-----------------------------|-----------------------------------------|
|                                                          | %Content of sample (%mg/mg) | % Difference with Unmodified conditions | %Content of sample (%mg/mg) | % Difference with Unmodified conditions |
| Flow rate (+0.1 mL/min)                                  | 0.23                        | 3.0                                     | 0.34                        | 1.9                                     |
|                                                          | 0.24                        | 3.1                                     | 0.33                        | 3.1                                     |
| Flow rate (-0.1 mL/min)                                  | 0.23                        | 0.1                                     | 0.34                        | 1.1                                     |
|                                                          | 0.22                        | 3.3                                     | 0.33                        | 2.9                                     |
| Column temperature (+2°C)                                | 0.21                        | 4.6                                     | 0.34                        | 0.0                                     |
|                                                          | 0.21                        | 2.1                                     | 0.32                        | 1.6                                     |
| Column temperature (-2°C)                                | 0.21                        | 4.7                                     | 0.34                        | 0.7                                     |
|                                                          | 0.21                        | 2.2                                     | 0.33                        | 0.4                                     |
| % Mobile phase A content (+5%)                           | 0.21                        | 3.5                                     | 0.34                        | 0.3                                     |
|                                                          | 0.21                        | 2.9                                     | 0.33                        | 0.7                                     |
| % Mobile phase A content (-5%)                           | 0.21                        | 3.7                                     | 0.34                        | 1.1                                     |
|                                                          | 0.21                        | 3.7                                     | 0.32                        | 2.3                                     |
| Mobile phase A: HCOONH <sub>4</sub> concentration (+10%) | 0.21                        | 4.6                                     | 0.34                        | 0.3                                     |
|                                                          | 0.21                        | 3.1                                     | 0.34                        | 1.4                                     |
| Mobile phase A: HCOONH <sub>4</sub> concentration (-10%) | 0.22                        | 0.4                                     | 0.33                        | 3.2                                     |
|                                                          | 0.22                        | 0.6                                     | 0.32                        | 2.8                                     |
| Mobile phase A pH (+0.2)                                 | 0.21                        | 4.6                                     | 0.34                        | 0.3                                     |
|                                                          | 0.21                        | 3.1                                     | 0.34                        | 1.4                                     |
| Mobile phase A pH (-0.2)                                 | 0.21                        | 1.1                                     | 0.35                        | 3.4                                     |
|                                                          | 0.21                        | 2.3                                     | 0.35                        | 4.8                                     |
